# Supplementary material for: Synthesis and spectral characterization of the phenothiazine-thiosemicarbazide probe for the optical solid-state detection of Hg2+ and Cu2+
Source: Royal Society of Chemistry journal article supplement (doi:10.1039/d3ra08624k), 2024-01-01
Supplement: d3ra08624k1.pdf [file d3ra08624k1.pdf]

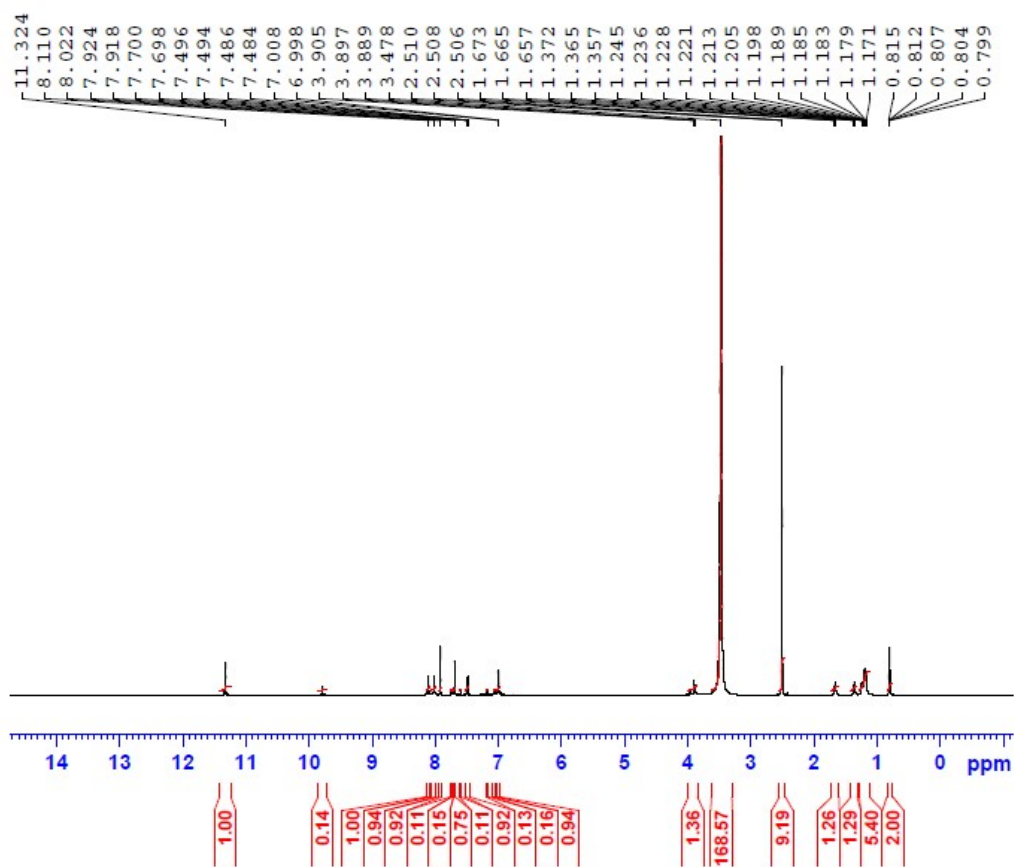

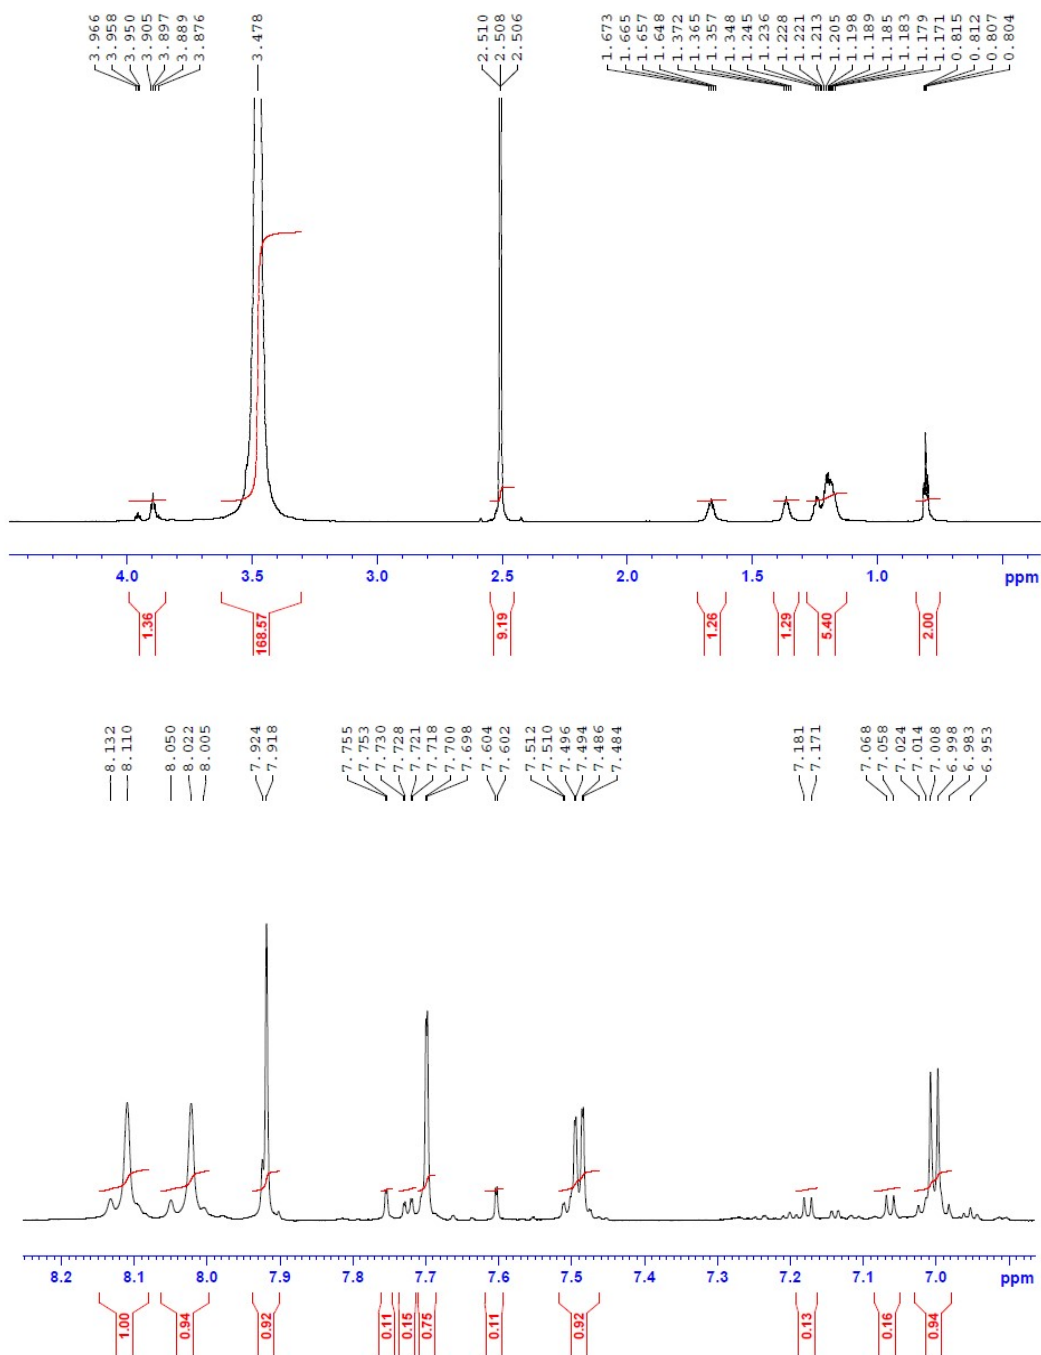

Figure S1: <sup>1</sup>H-NMR of PTZDS

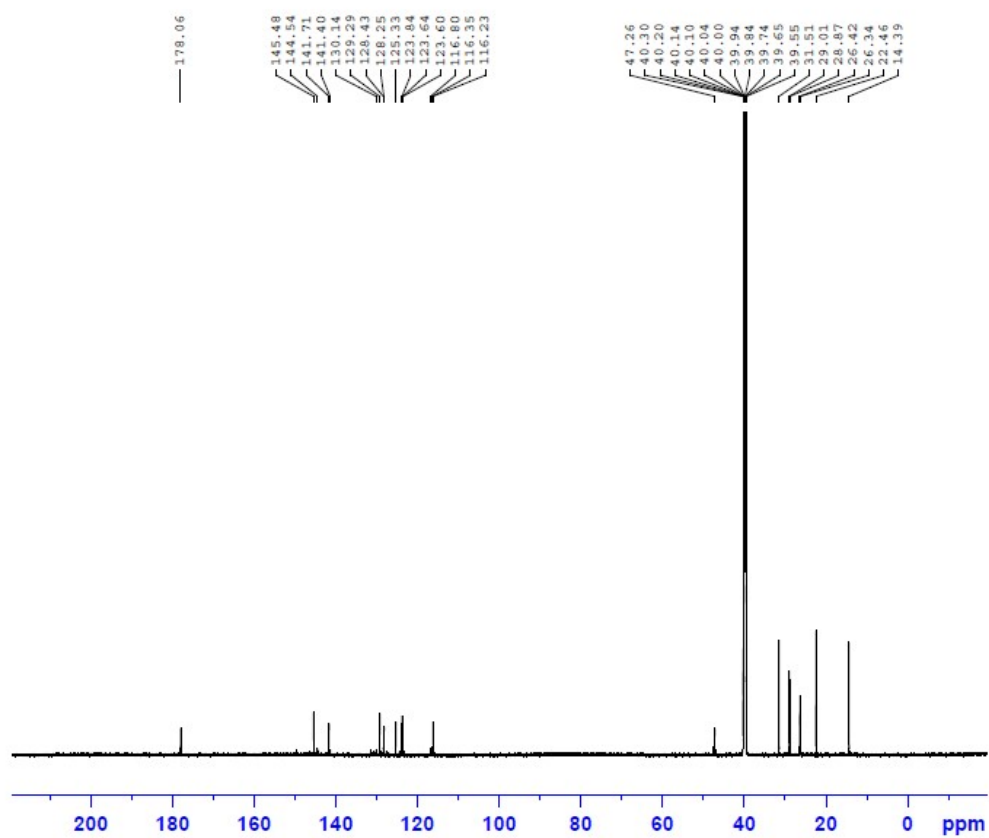

Figure S2:  $^{13}\text{C}$  of PTZDS

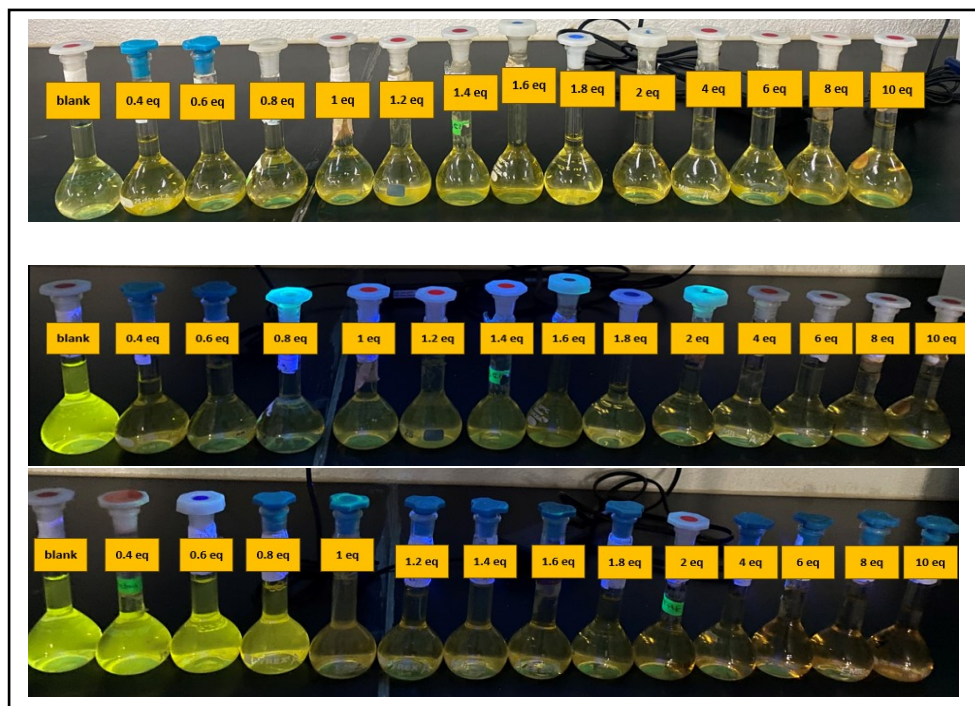

**Figure S3. A PTZDS photograph of  $\text{Cu}^{2+}$  (0-10 equivalents) and  $\text{Hg}^{2+}$  (0-10 equivalents) additions, respectively**
